# Supplementary material for: A single-administration therapeutic interfering particle reduces SARS-CoV-2 viral shedding and pathogenesis in hamsters
Source: PubMed Central journal article supplement (PMC9522362; doi:10.1073/pnas.2204624119), 2022-09-08
Supplement: pnas.2204624119.sapp.pdf [file pnas.2204624119.sapp.pdf]

## Supplementary Information for:

### **A single-administration therapeutic interfering particle reduces SARS-CoV-2 viral shedding and pathogenesis in hamsters**

Sonali Chaturvedi<sup>1,2,†</sup>, Nathan Beutler<sup>6,†</sup>, Michael Pablo<sup>1,2,†</sup>, Gustavo Vasen<sup>1,2</sup>, Xinyue Chen<sup>1,2</sup>, Giuliana Calia<sup>1,2</sup>, Lauren Buie<sup>5</sup>, Robert Rodick<sup>5</sup>, Davey Smith<sup>7</sup>, Thomas Rogers<sup>6,7,\*</sup>, Leor S. Weinberger<sup>1,2,3,4,\*</sup>

†these authors contributed equally

\*to whom correspondence should be addressed: [trogers@scripps.edu](mailto:trogers@scripps.edu),  
[leor.weinberger@gladstone.ucsf.edu](mailto:leor.weinberger@gladstone.ucsf.edu)

#### **This PDF file includes:**

Figures S1 to S5  
Tables S1  
SI References

# Supplemental Figure 1

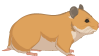

Source

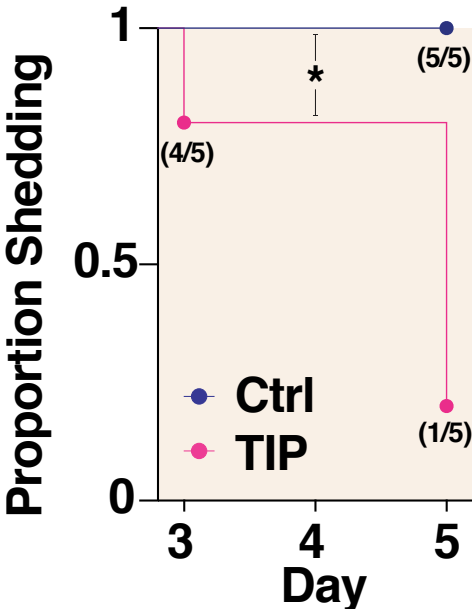

**Figure S1: Proportion of source hamsters shedding detectable virus quantified using the virus titer data in Fig. 1C and presented as a Kaplan-Meier plot. \*,  $p < 0.05$  by Log-rank (Mantel-Cox) test.**

# Supplemental Figure 2

## Source Ctrl

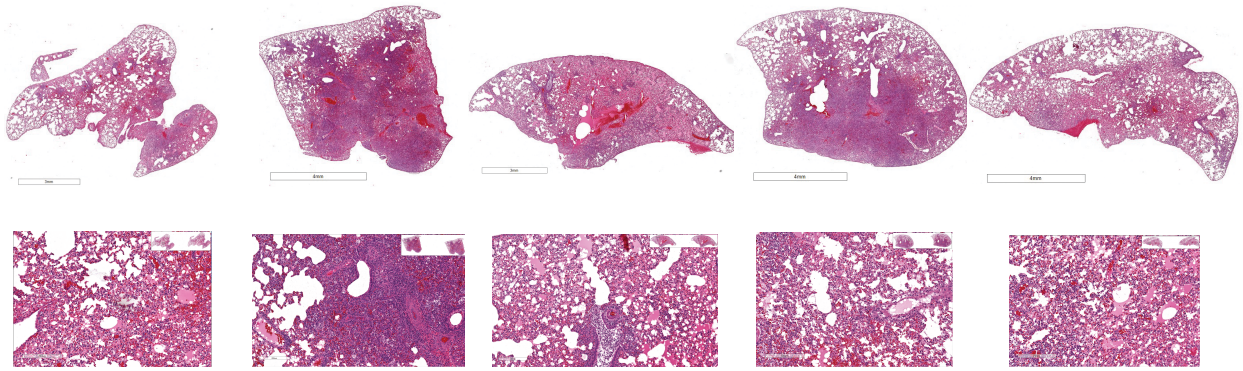

## Source TIP

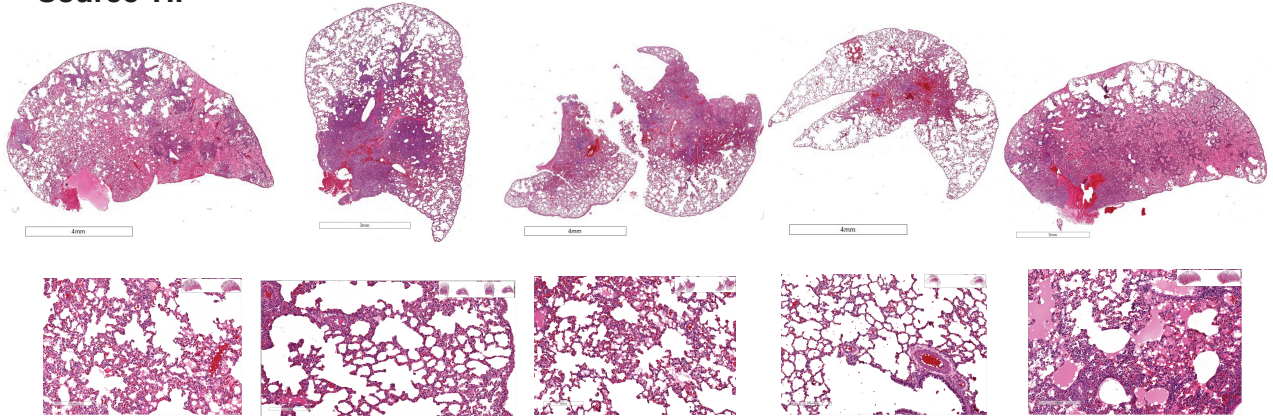

## Contact Ctrl

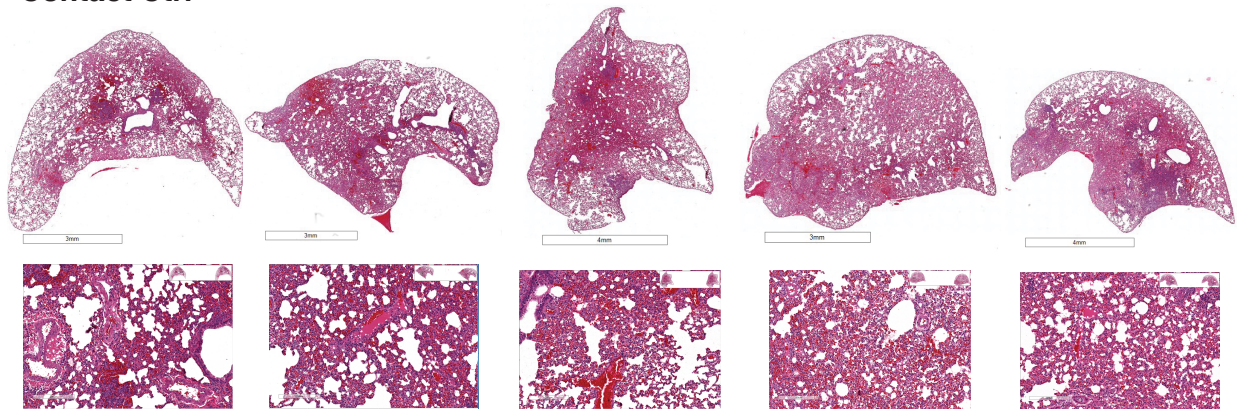

## Contact TIP

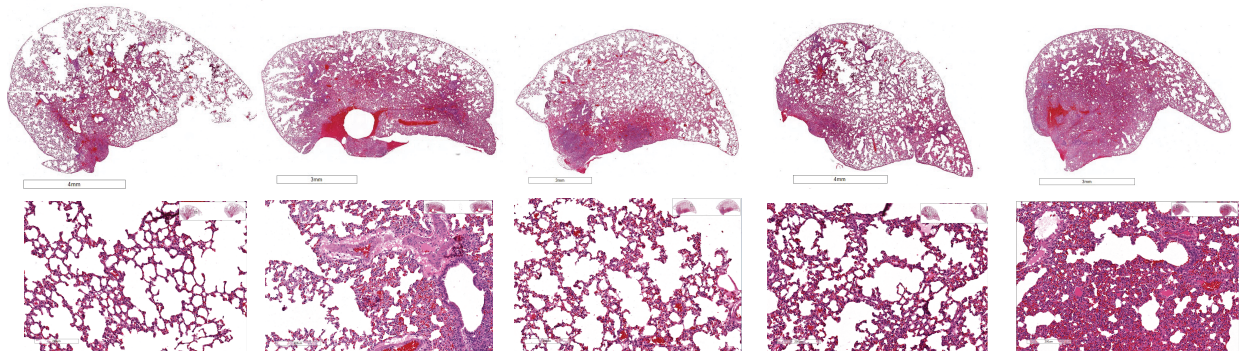

**Figure S2.: Histopathology imaging of Syrian golden hamster lungs from source animals infected with SARS-CoV-2 (B.1.617.2) followed by intranasal Ctrl- or TIP-LNP treatment and their respective contact animals.** Syrian golden hamsters (source) were intranasally infected with  $10^6$  PFU of SARS-CoV-2 (B.1.617.2), at 6 h post-infection, intranasal administration of TIP LNPs (n=5) or Ctrl RNA LNPs (n=5) was performed. At 36 h post-infection, uninfected and untreated hamsters (contact) were brought in direct contact with the source hamsters for 8 hours. At 44 h post-infection, source and contact hamsters were caged alone, lungs of source and contact animals were harvested at day 5 and day 6 respectively, fixed with Zn-formalin and histopathology was performed. Sticked images were analyzed using Leica Aperio ImageScope software. For each animal a representative zoomed-in section to visualize histopathology are shown. Micrographs of brightfield imaging of H&E-stained lung sections from all animals are shown (*first row*: Ctrl RNA treated source (n=5), *second row*: TIP RNA treated source (n=5), *third row*: contact hamsters cohoused with Ctrl-treated hamsters (n=5), *fourth row*: contact hamsters cohoused with TIP-treated hamsters (n=5)).

# Supplemental Figure 3

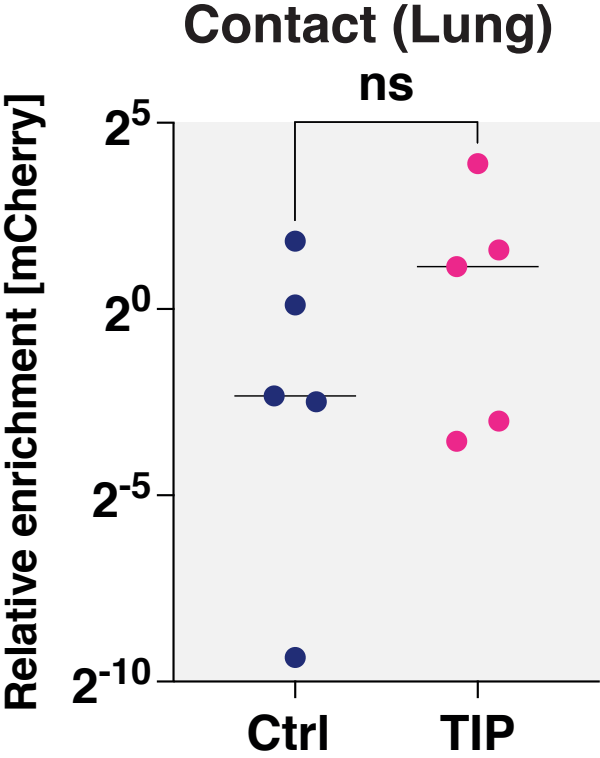

**Figure S3: No evidence for transmission of TIP to contacts from source animals infected with SARS-CoV-2 (B.1.617.2) followed by intranasal Ctrl- or TIP-LNP treatment.** Lungs from contacts (at day 6) of TIP-treated (n=5) or Ctrl-treated (n=5) animals were harvested, homogenized, and qRT-PCR was performed for mCherry (TIP marker) and normalized to beta-actin. ns,  $p > 0.05$ .

# Supplemental Figure 4

## Hamsters treated with TIPs at 12 hours post infection

**A**

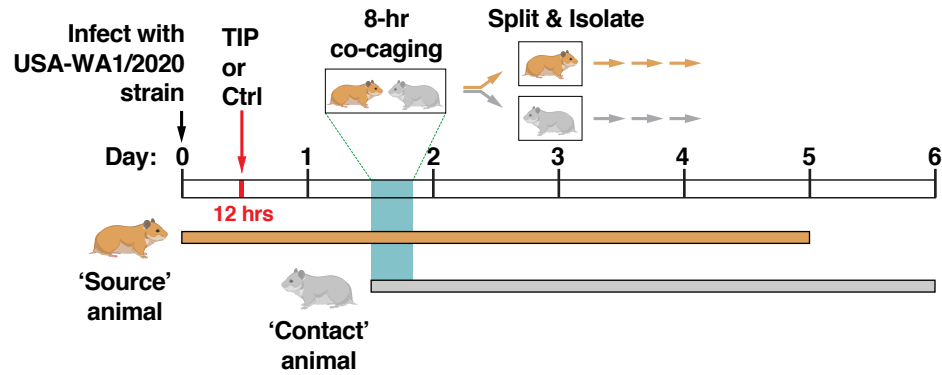

**B**

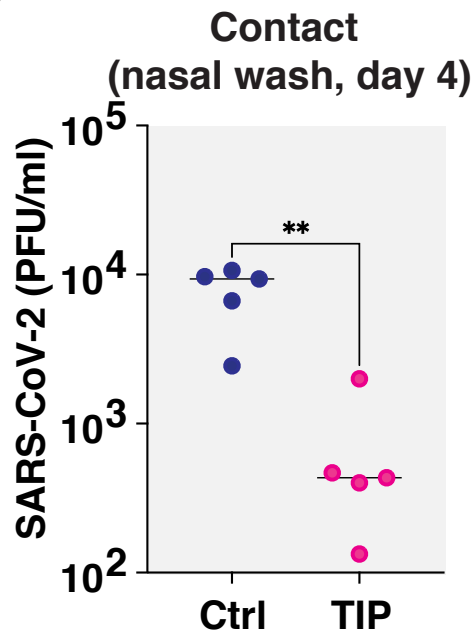

**C**

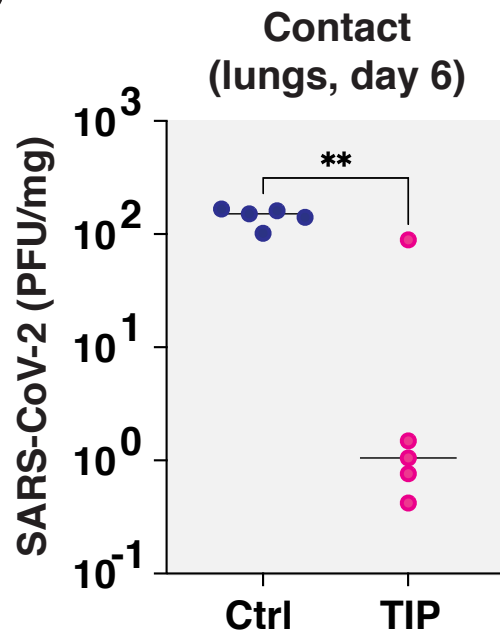



**Figure S4: TIP treatment post-infection (USA-WA1/2020) results in lower viral shedding and reduced viral load in the lungs of contact animals.** **(A)** Schematic of experimental design. Syrian golden hamsters (M/8-week-old) were intranasally infected with  $10^6$  PFU of SARS-CoV-2 (USA-WA1/2020) in 100 $\mu$ l of DMEM, as described (29). At 12-h post, hamsters were intranasally administered with 100 $\mu$ l of LNP solution containing either TIP RNA (n=5) or Ctrl RNA (n=5), at 36-h post infection, the source animals were co-caged with naïve animals (contact animals) for 8 hours, and all animals were caged individually starting 44-h post-infection. Nasal washes were collected for contact animals on day 3 and 4 followed by harvesting of lungs at day 6 (5 days after co-caging). **(B)** Exposure to TIP-treated animals reduces virus shedding in contacts, as measured by plaque assay of nasal washes from day 4. **(C)** Exposure to TIP-treated animals reduces infectious viral load in lungs of contacts, as compared to exposure to Ctrl-treated animals. Lungs from contacts were harvested, homogenized, and SARS-CoV-2 virus titer was quantified by plaque assay.

# Supplemental Figure 5

## A Model error convergence

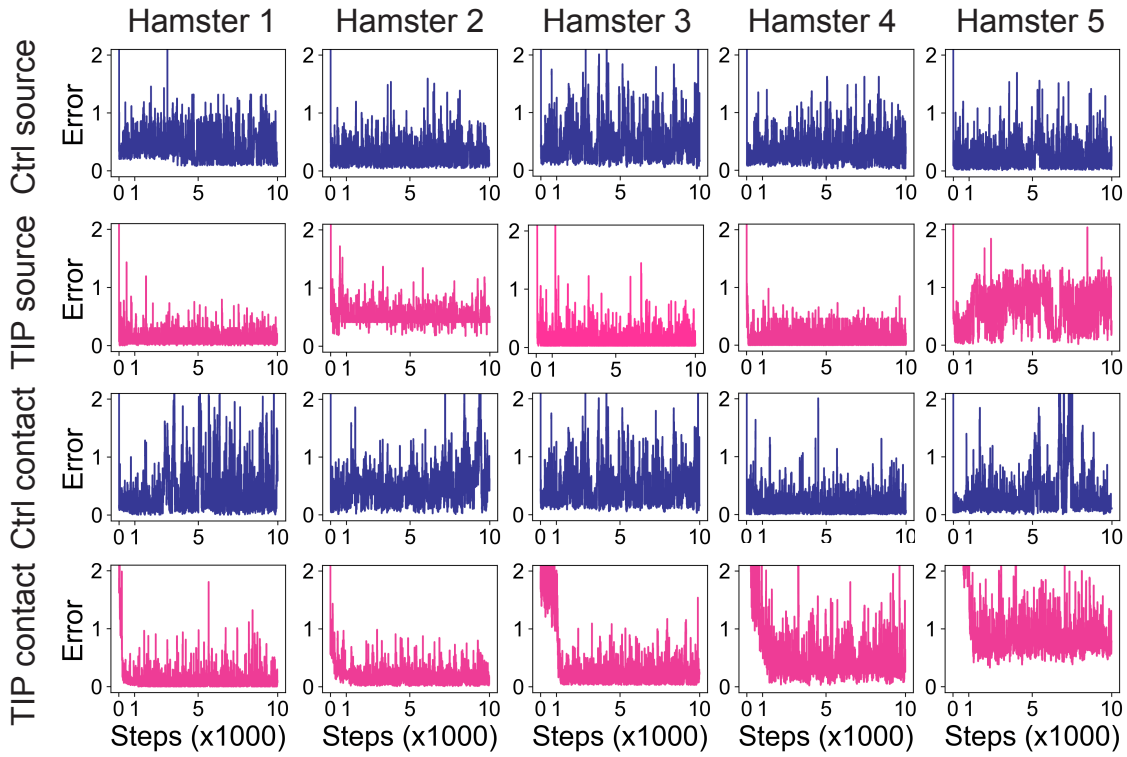

## B Model parameter distributions

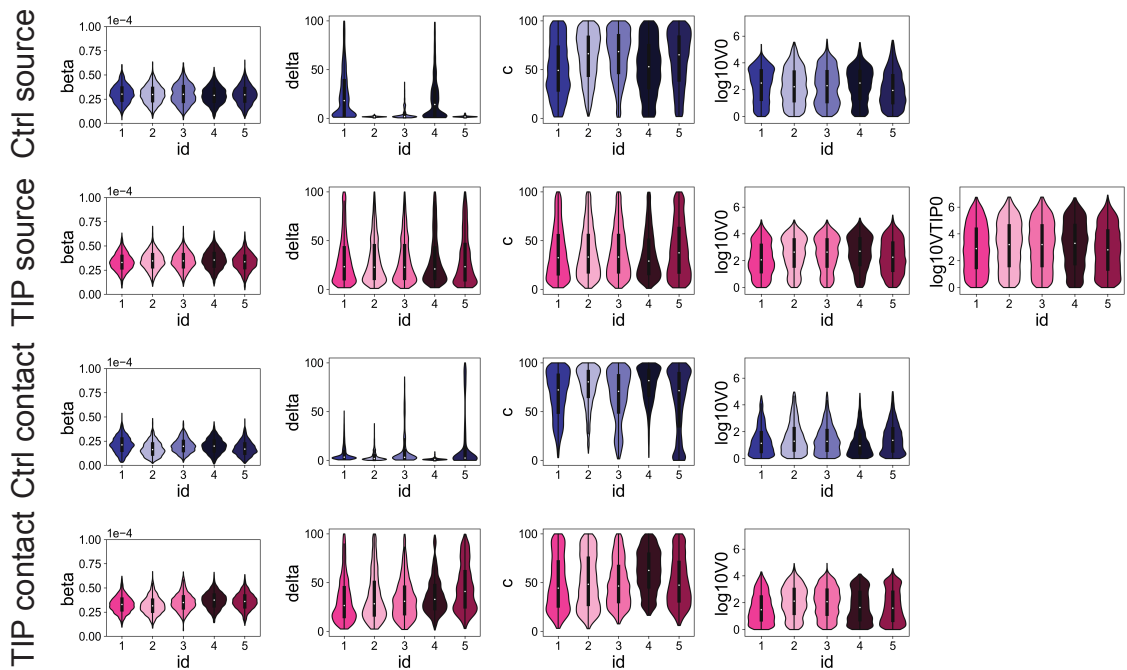

**Figure S5: Model fitting to source and contact hamster data.** (A) Diagnostic plots across the 10,000 DRAM-MCMC steps, exhibiting convergence of fitting error. The first 1,000 steps are discarded as burn-in, and the posterior distribution (parameters, and median prediction, and predicted credible intervals) are generated by sampling from the remaining 9,000 steps. (B) The posterior parameter distributions indicate that the values of individual parameters have large uncertainty. Parameter uncertainty is likely due to both structural non-identifiability, driven by parameters compensating for one another with no impact on the observed variable, and practical non-identifiability, driven by variation inherent in the data, and limited availability of time points.

**Table S1.** List and sequences of oligonucleotides used in the study.

|     |                                       |                                                                              |
|-----|---------------------------------------|------------------------------------------------------------------------------|
| 1   | N gene qpcr                           | fw: aaatTTTggggaccaggaac<br>rev: tggcacctgtgtaggtcaac                        |
| 2   | b-actin ( <i>M. auratus</i> ) qpcr    | fw: actgccgcacacctcttct<br>rev: tcgttgccaatggtgatgac                         |
| 3   | IL6 ( <i>M. auratus</i> ) qPCR        | fw: ggtatgctaaggcacagcact<br>rev: cctgaaagcacttgaagaattcc                    |
| 4   | IL10 ( <i>M. auratus</i> ) qPCR       | fw: gaaggaccagctggacaaca<br>rev: tggcaaccaagtaaccctta                        |
| 5   | TNF ( <i>M. auratus</i> ) qPCR        | fw: ggagtggctgagccatcgt<br>rev: agctgggtgtctttgagagacatg                     |
| 6   | IL1-beta ( <i>M. auratus</i> ) qPCR   | fw: ggctgatgctccattcg<br>rev: cacgaggcatttctgtgttca                          |
| 7   | CCL20 ( <i>M. auratus</i> ) qPCR      | fw: agtcagtcagaagcaagcaact<br>rev: tgaagcggtgcatgatcc                        |
| 8   | IL4 ( <i>M. auratus</i> ) qPCR        | fw: ccacggagaaagacctcatctg<br>rev: gggtcacctcatgttgaaataaa                   |
| 9   | IL10 ( <i>M. auratus</i> ) qPCR       | fw: gttgccaaccttatcagaaatga<br>rev: ttctggcccgtggttctct                      |
| 10  | IL2 ( <i>M. auratus</i> ) qPCR        | fw: gtgcaccacttcaagctctaa<br>rev: aagctcctgtaagtcagcagtaac                   |
| 11  | CXCL10 ( <i>M. auratus</i> ) qPCR     | fw: gccattcatccacagttgaca<br>rev: catggtgctgacagtggagtct                     |
| 12  | ISG15 ( <i>M. auratus</i> ) qPCR      | fw: tctatgaggtccggctgaca<br>rev: gcactggggctttaggtcat                        |
| 13. | IFN- gamma ( <i>M. auratus</i> ) qPCR | fw: ggccatccagaggagcatag<br>rev: ttctccatgctgctgttgaa                        |
| 14. | TIPs PCR primers                      | t7 fw: taatacgactcactataggattaaagggt<br>rev: tttttttttttttgtcattctcctaagaagc |
| 15. | mCherry qPCR                          | fw: gaacggccacgagttcgaga<br>rev: cttggagccgtacatgaactgagg                    |
